# Supplementary material for: Sequential Cross-linking of Gallic Acid-Functionalized GelMA-Based Bioinks with Enhanced Printability for Extrusion-Based 3D Bioprinting
Source: PubMed Central journal article supplement (PMC9832479; doi:10.1021/acs.biomac.2c01418), 2022-12-22
Supplement: bm2c01418_si_001.pdf [file bm2c01418_si_001.pdf]

**Supporting Information**

Sequential Crosslinking of Gallic Acid  
Functionalized GelMA-based Bioinks with  
Enhanced Printability for Extrusion-based 3D  
Bioprinting

*Hatai Jongprasitkul<sup>a</sup>, Sanna Turunen<sup>a,b</sup>, Vijay Singh Parihar<sup>a,\*</sup>, Minna Kellomäki<sup>a</sup>*

<sup>a</sup>Biomaterials and Tissue Engineering Group, BioMediTech, Faculty of Medicine and Health  
Technology, Tampere University, 33720 Tampere, Finland

<sup>b</sup>Brinter Ltd, 20520 Turku, Finland

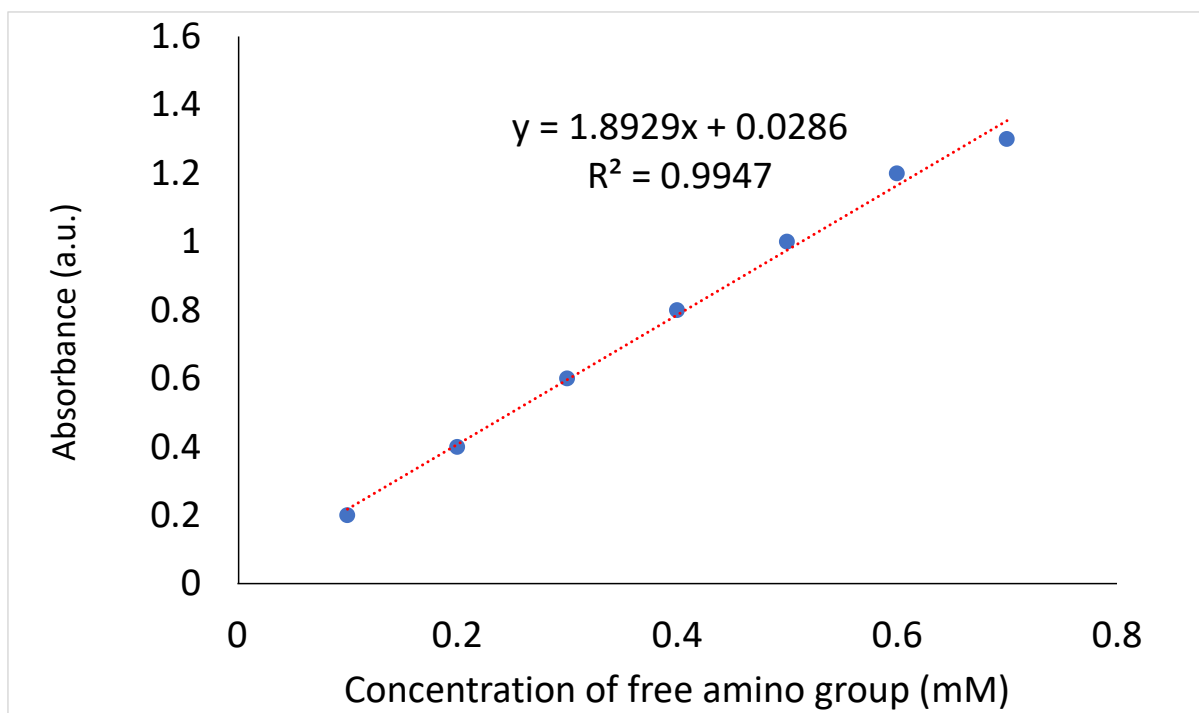

Figure S1: Calibration curve for residual amine concentration using glycine standard by varying concentrations and under identical conditions to Gelatin A, GelMA and GelMAGA.

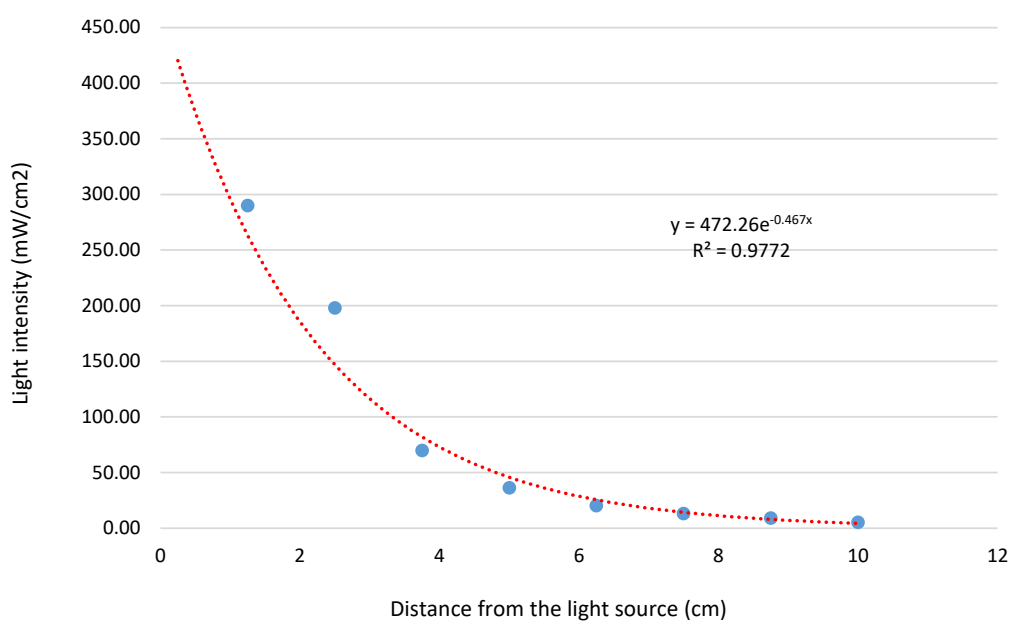

Figure S2: The measured UV light intensity vs distance from the light source.

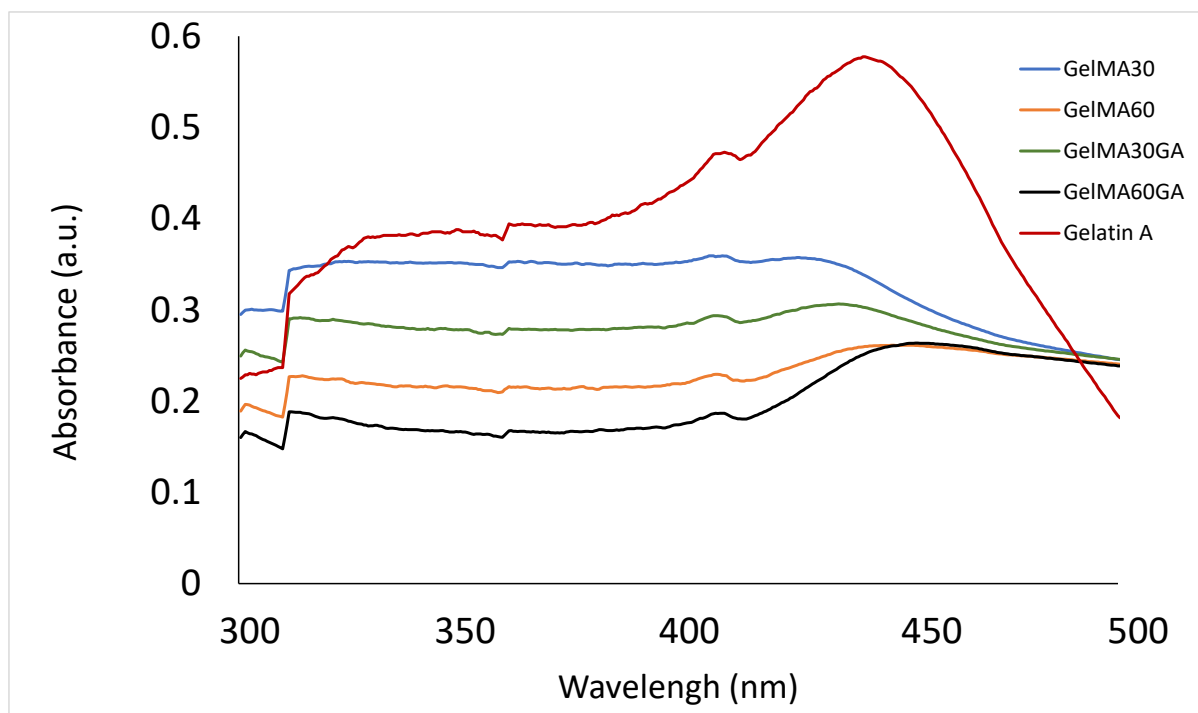

Figure S3: UV-Vis spectra of Gelatin type A, GelMA and GelMAGA. Gelatin Type A contained 0.29 mmol/g of free amines according to the calibration curve (Figure S1).

Table S1: The degree of methacrylation and gallic acid modification based on free amine concentration.

| Materials      | Abs. | Free amines |       | Methacrylate |    | Gallic acid |       |
|----------------|------|-------------|-------|--------------|----|-------------|-------|
|                |      | mmol/g      | %     | mmol/g       | %  | mmol/g      | %     |
| Gelatin type A | 0.46 | 0.29        | 100   | 0            | 0  | 0           | 0     |
| GelMA30        | 0.33 | 0.20        | 68.96 | 0.09         | 31 | 0           | 0     |
| GelMA60        | 0.21 | 0.11        | 37.93 | 0.18         | 64 | 0           | 0     |
| GelMA30GA      | 0.29 | 0.17        | 58.62 |              |    | 0.031       | 10.34 |
| GelMA60GA      | 0.15 | 0.08        | 27.96 |              |    | 0.028       | 9.97  |

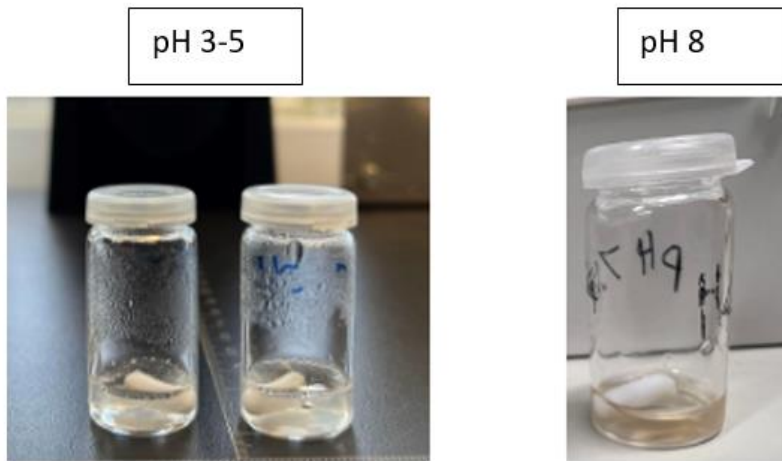

Figure S4: The further confirmation of GelMAGA conjugation, the solution turned light brown at pH 8.

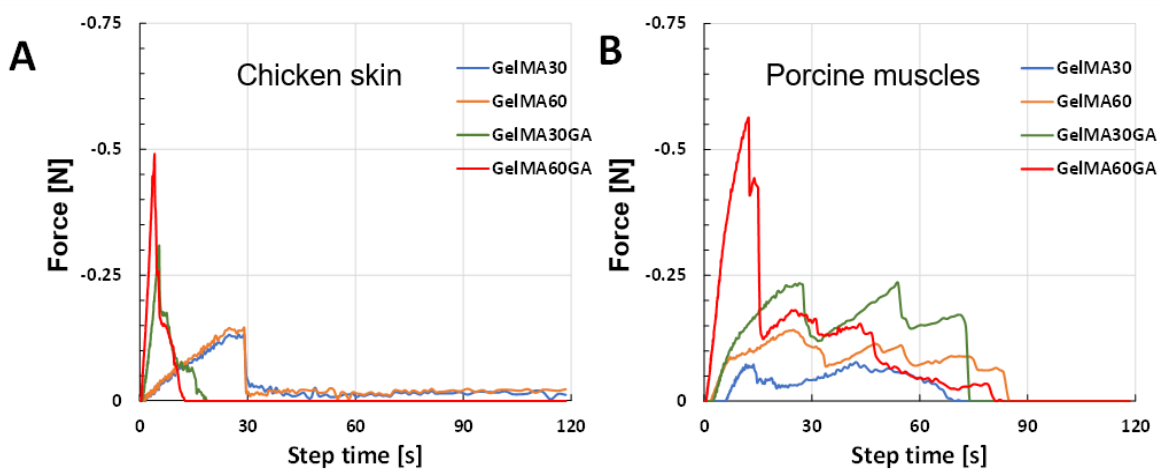

Figure S5: Measured tissue adhesive force for GelMA30, GelMA60, GelMA30GA and GelMA60GA with (A) chicken skin and (B) porcine muscles. The mean ( $n=3$ ) of the measurements is shown. Standard deviations are not presented as they were smaller than the curve because the data was measured in milliseconds.

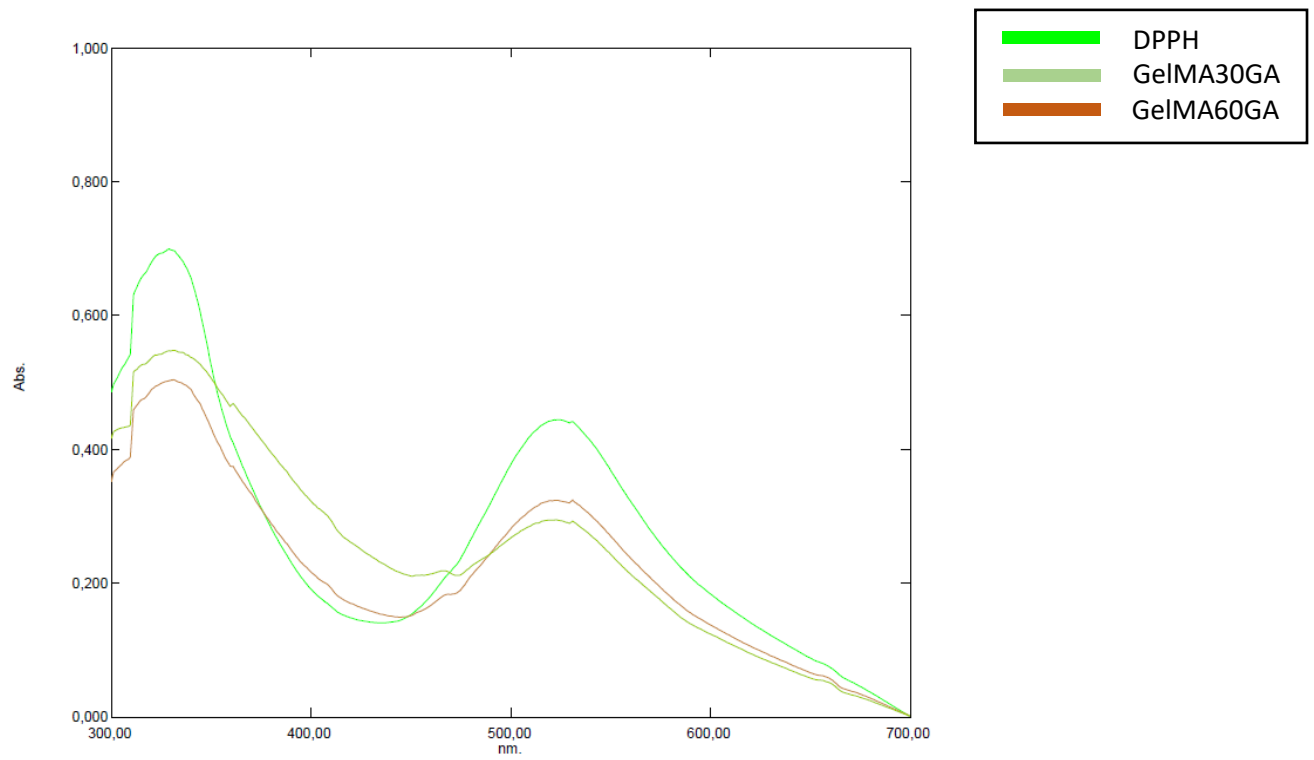

Figure S6: The antioxidant property of GelMA30GA (yellowish green) and GelMA60GA (brown), determined via DPPH (green) radical scavenging assay.
